# Supplementary material for: Peptide Mimics of the Ribosomal P Stalk Inhibit the Activity of Ricin A Chain by Preventing Ribosome Binding
Source: MDPI journal article supplement (doi:10.3390/toxins10090371), 2018-09-13
Supplement: s1 [file s1]

# Supplementary Materials: Peptide Mimics of the Ribosomal P Stalk Inhibit the Activity of Ricin A Chain by Preventing Ribosome Binding

Xiao-Ping Li, Jennifer N. Kahn and Nilgun E. Tumer

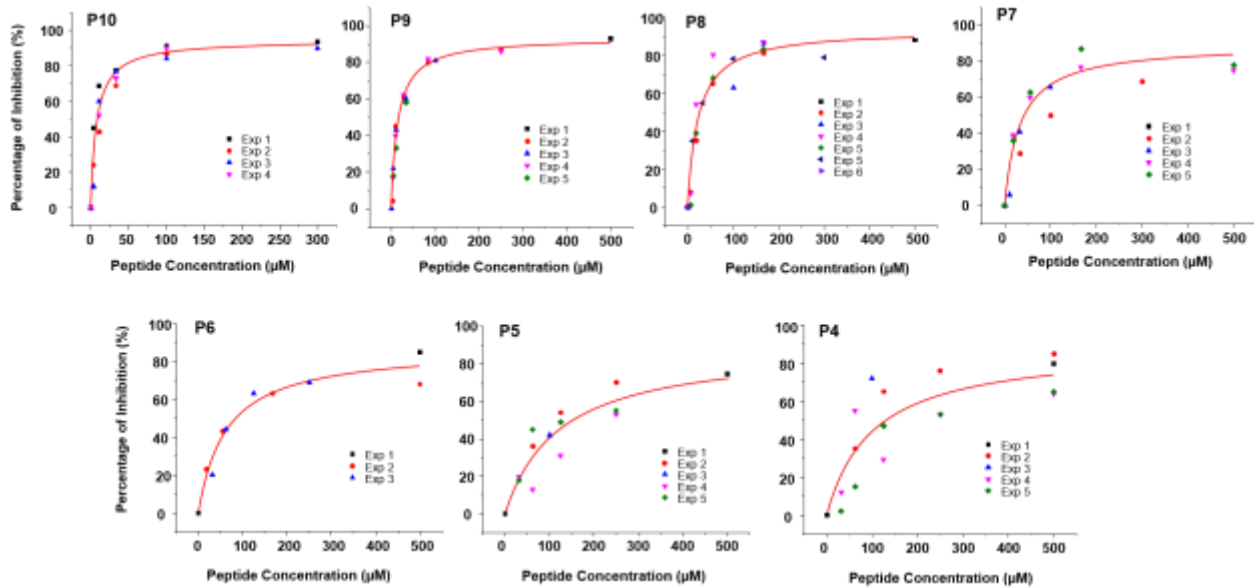

**Figure S1.** Inhibition of depurination activity of RTA on yeast ribosomes by peptides P10–P3. The IC<sub>50</sub> values were determined as in Figure 6 and are shown in Table 2.

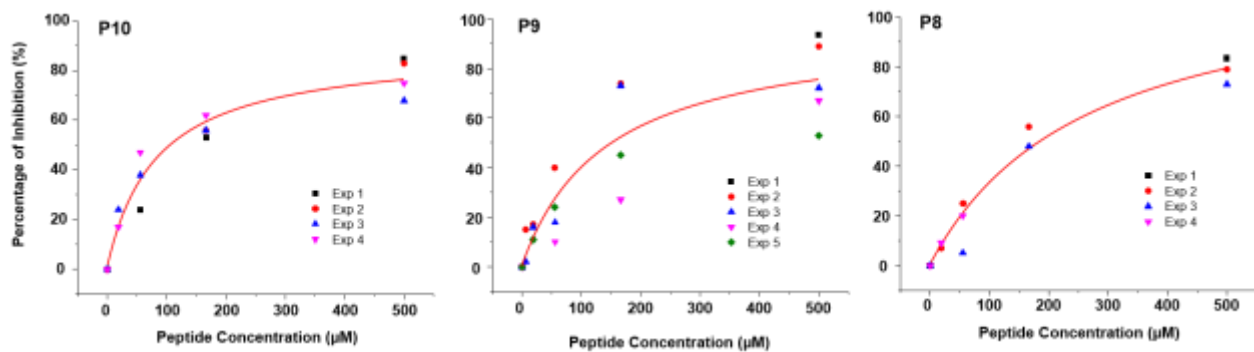

**Figure S2.** Inhibition of depurination activity of RTA on rat liver ribosomes by peptides P10, P9, and P8. The IC<sub>50</sub> values were determined as in Figure 6 and are shown in Table 2.
